# Supplementary material for: Exploring the Cost-Effectiveness of Mechanical Thrombectomy Beyond 6 Hours Following Advanced Imaging in the United Kingdom
Source: PubMed Central journal article supplement — Stroke. 2019 Oct 22;50(11):3220–7. doi: 10.1161/STROKEAHA.119.026816 (PMC6824506; doi:10.1161/strokeaha.119.026816), 2019-10-22
Supplement: str-50-3220-s001.pdf [file str-50-3220-s001.pdf]

# SUPPLEMENTAL MATERIAL

**Table I: model parameters and range of values for sensitivity analysis**

| <b>Probabilities in the decision tree</b>                                                                                                                                         |                 |              |                                    |                                                                                                                             |
|-----------------------------------------------------------------------------------------------------------------------------------------------------------------------------------|-----------------|--------------|------------------------------------|-----------------------------------------------------------------------------------------------------------------------------|
| Model input<br>Probability that/of                                                                                                                                                | Base-case value | Distribution | Distribution parameters            | Reference(s) and comments                                                                                                   |
| a suspected stroke patient of the emergency setting has an ischemic stroke                                                                                                        | 69.7%           | Dirichlet    | 0-1                                | SSNAP Sentinel Stroke National Audit Programme (1)                                                                          |
| a suspected stroke patient of the emergency setting has an hemorrhagic stroke                                                                                                     | 10.2%           | Dirichlet    | 0-1                                |                                                                                                                             |
| a suspected stroke patient of the emergency setting has a non-stroke                                                                                                              | 20.1%           | Dirichlet    | 0-1                                |                                                                                                                             |
| an ischemic patient is imaged (CT or AdvImg) within 4.5 hours after symptom onset                                                                                                 | 24%             | Beta         | $\alpha = 24$<br>$\beta = 76$<br>* | Multiple sources, see calculation methods in Appendix                                                                       |
| an ischemic patient is imaged (CT or AdvImg) beyond 4.5 hours or that the time from symptom onset is unknown                                                                      | 76%             | Beta         | NA*                                |                                                                                                                             |
| an ischemic patient imaged (CT or AdvImg) beyond 4.5 hours is assessed within 6 hours after symptom onset                                                                         | 3.4%            | Beta         | $\alpha = 3$<br>$\beta = 97$<br>*  | Multiple sources, see calculation methods in Appendix                                                                       |
| an ischemic patient imaged (CT+CTA or AdvImg) between 4.5 and 6 hours receives MT within 6 hours                                                                                  | 8.1%            | Dirichlet    | 0-1                                | Multiple sources, see calculation methods in Appendix                                                                       |
| an ischemic patient fully imaged (CT+CTA) between 4.5 and 6 hours does not receive MT within 6 hours                                                                              | 27.6%           | Dirichlet    |                                    | CCEMT strategy: 30% of the patients imaged between 4.5 and 6 hours and not receiving MT were assumed to have received a CTA |
| an ischemic patient imaged (CT) between 4.5 and 6 hours receives neither CTA nor MT within 6 hours                                                                                | 64.3%           | Dirichlet    |                                    |                                                                                                                             |
| an ischemic patient who received IV-tPA receives MT (following CTA for the CCEMT path) within 6 hours                                                                             | 3.4%            | Dirichlet    | 0-1                                | Multiple sources, see calculation methods in Appendix.                                                                      |
| an ischemic patient who received IV-tPA receives CTA but no MT within 6 hours                                                                                                     | 29%             | Dirichlet    |                                    | CCEMT strategy: 30% of the patients who received IV-tPA and are not receiving MT were assumed to have received a CTA        |
| an ischemic patient who received IV-tPA receives neither CTA nor MT within 6 hours                                                                                                | 67.6%           | Dirichlet    |                                    |                                                                                                                             |
| an ischemic patient imaged (CT or AdvImg) within 4.5 hours receives IV-tPA                                                                                                        | 61%             | Dirichlet    | 0-1                                | SSNAP Sentinel Stroke National Audit Programme (1)<br>See calculation in Appendix                                           |
| an ischemic patient imaged (CT or AdvImg) within 4.5 hours receives MT alone (without IV-tPA) (following CTA for the CCEMT path) within 4.5 hours                                 | 0.3%            | Dirichlet    |                                    | Multiple sources, see calculation methods in Appendix                                                                       |
| an ischemic patient imaged within 4.5 hours receives CTA but no treatment within 4.5 hours (CCEMT strategy)                                                                       | 11.7%           | Dirichlet    |                                    | CCEMT strategy: 30% of the patients who did not receive IV-tPA and are not receiving MT were assumed to have received a CTA |
| an ischemic patient imaged (CT or AdvImg) within 4.5 hours receives no CTA and no treatment within 4.5 hours (CCEMT strategy)                                                     | 27%             | Dirichlet    |                                    |                                                                                                                             |
| *: given the different sources used and hypothesis made in calculating the base-case value, we considered a conservative sample size of 100 to calculate the $\alpha$ and $\beta$ |                 |              |                                    |                                                                                                                             |
| <b>Health outcomes at 90 days in the decision tree</b>                                                                                                                            |                 |              | <b>Range</b>                       | <b>Comments</b>                                                                                                             |
| mRS 0 after MT beyond 4,5 and up to 6 hours from onset                                                                                                                            | 7.9%            | Dirichlet    | 0-1                                | Minnerup (3)<br>Germany, REVASK registry                                                                                    |

|                                                                        |        |           |     |                         |                                                                                                                                                          |
|------------------------------------------------------------------------|--------|-----------|-----|-------------------------|----------------------------------------------------------------------------------------------------------------------------------------------------------|
| mRS 1-2 after MT beyond 4,5 and up to 6 hours from onset               | 33.2%  | Dirichlet | 0-1 |                         |                                                                                                                                                          |
| mRS 3-5 after MT beyond 4,5 and up to 6 hours from onset               | 33.9%  | Dirichlet | 0-1 |                         |                                                                                                                                                          |
| mRS 6 after MT beyond 4,5 and up to 6 hours from onset                 | 25%    | Dirichlet | 0-1 |                         |                                                                                                                                                          |
| mRS 0 after no IV-tPA nor MT beyond 4,5 and up to 6 hours from onset   | 18%    | Dirichlet | 0-1 | Hacke (4)               | 14 European countries Australia and New-Zealand. ECASS II trial. Outcome for the placebo-group patients (against iv-TPA).                                |
| mRS 1-2 when no IV-tPA nor MT beyond 4,5 and up to 6 hours from onset  | 28.3%  | Dirichlet | 0-1 |                         |                                                                                                                                                          |
| mRS 3-5 when no IV-tPA nor MT beyond 4,5 and up to 6 hours from onset  | 43.5%  | Dirichlet | 0-1 |                         |                                                                                                                                                          |
| mRS 6 when no IV-tPA nor MT beyond 4,5 and up to 6 hours from onset    | 10.4%  | Dirichlet | 0-1 |                         |                                                                                                                                                          |
| Health outcomes for patients with onset above 6 hours                  |        |           |     |                         |                                                                                                                                                          |
| TP (AIELMT strategy)                                                   |        |           |     |                         |                                                                                                                                                          |
| mRS 0 after LVO and MT alone beyond 6 hours from onset                 | 9.3%   | Dirichlet | 0-1 | Nogueira (5)            | DAWN trial, MT arm, 5% of the patients in the arm received IV-tPA                                                                                        |
| mRS 1-2 after LVO and MT alone beyond 6 hours from onset               | 39.3%  | Dirichlet | 0-1 |                         |                                                                                                                                                          |
| mRS 3-5 after LVO and MT alone beyond 6 hours from onset               | 26.3%  | Dirichlet | 0-1 |                         |                                                                                                                                                          |
| mRS 6 after LVO and MT alone beyond 6 hours from onset                 | 25.3%  | Dirichlet | 0-1 |                         |                                                                                                                                                          |
| FN and MT would benefit (respectively AIELMT and CCEMT strategies)     |        |           |     |                         |                                                                                                                                                          |
| mRS 0 after LVO and no MT beyond 6 hours from onset                    | 4.3%   | Dirichlet | 0-1 | Nogueira (5)            | DAWN trial, control arm, 13% of the patients in the arm received IV-tPA                                                                                  |
| mRS 1-2 after LVO and no MT beyond 6 hours from onset                  | 9.3%   | Dirichlet | 0-1 |                         |                                                                                                                                                          |
| mRS 3-5 after LVO and no MT beyond 6 hours from onset                  | 50.3%  | Dirichlet | 0-1 |                         |                                                                                                                                                          |
| mRS 6 after LVO and no MT beyond 6 hours from onset                    | 36.3%  | Dirichlet | 0-1 |                         |                                                                                                                                                          |
| TN and MT would not benefit (respectively AIELMT and CCEMT strategies) |        |           |     |                         |                                                                                                                                                          |
| mRS 0 after mild stroke and no MT beyond 6 hours from onset            | 18.3%  | Dirichlet | 0-1 | Lees (6)                | Pooled analysis from 9 randomized trials, patients with mild stroke (NIHSS 5 to 10, mean NIHSS 7.4, control arm against IV-tPA (supplementary material)) |
| mRS 1-2 after mild stroke and no MT beyond 6 hours from onset          | 42.5%  | Dirichlet | 0-1 |                         |                                                                                                                                                          |
| mRS 3-5 after mild stroke and no MT beyond 6 hours from onset          | 30.2%  | Dirichlet | 0-1 |                         |                                                                                                                                                          |
| mRS 6 after mild stroke and no MT beyond 6 hours from onset            | 9%     | Dirichlet | 0-1 |                         |                                                                                                                                                          |
| FP (AIELMT strategy)                                                   |        |           |     |                         |                                                                                                                                                          |
| mRS 0 after mild stroke and no MT beyond 6 hours from onset            | 16.5%  | Dirichlet | 0-1 | Lees (6) and Gascou (7) | Outcomes after correction of TN for procedural complications                                                                                             |
| mRS 1-2 after mild stroke and no MT beyond 6 hours from onset          | 40.7%  | Dirichlet | 0-1 |                         |                                                                                                                                                          |
| mRS 3-5 after mild stroke and no MT beyond 6 hours from onset          | 28.4%  | Dirichlet | 0-1 |                         |                                                                                                                                                          |
| mRS 6 after mild stroke and no MT beyond 6 hours from onset            | 14.4%  | Dirichlet | 0-1 |                         |                                                                                                                                                          |
| Health outcomes (AIELMT and CCEMT strategies)                          |        |           |     |                         |                                                                                                                                                          |
| mRS 0 after IV-tPA and MT within 4.5 hours from onset                  | 3%     | Dirichlet | 0-1 | Berkhemer (8)           | Netherlands, MR CLEAN trial, IV-tPA and MT arm, iv-TPA until 4.5 hours but MT until 6 hours                                                              |
| mRS 1-2 after IV-tPA and MT within 4.5 hours from onset                | 30%    | Dirichlet | 0-1 |                         |                                                                                                                                                          |
| mRS 3-5 after IV-tPA and MT within 4.5 hours from onset                | 46%    | Dirichlet | 0-1 |                         |                                                                                                                                                          |
| mRS 6 after IV-tPA and MT within 4.5 hours from onset                  | 21%    | Dirichlet | 0-1 |                         |                                                                                                                                                          |
| mRS 0 after IV-tPA alone within 4.5 hours from onset                   | 6.25%  | Dirichlet | 0-1 | Berkhemer (8)           | Netherlands, MR CLEAN trial, IV-tPA and MT arm                                                                                                           |
| mRS 1-2 after IV-tPA alone within 4.5 hours from onset                 | 29.25% | Dirichlet | 0-1 |                         |                                                                                                                                                          |

|                                                            |        |           |     |              |                                                                                                                           |
|------------------------------------------------------------|--------|-----------|-----|--------------|---------------------------------------------------------------------------------------------------------------------------|
| mRS 3-5 after IV-tPA alone within 4.5 hours from onset     | 42.25% | Dirichlet | 0-1 |              |                                                                                                                           |
| mRS 6 after IV-tPA alone within 4.5 hours from onset       | 22.25% | Dirichlet | 0-1 |              |                                                                                                                           |
| mRS 0 after MT alone within 4.5 hours from onset           | 7.9%   | Dirichlet | 0-1 | Minnerup (3) | Germany, REVASK registry                                                                                                  |
| mRS 1-2 after MT alone within 4.5 hours from onset         | 33.2%  | Dirichlet | 0-1 |              |                                                                                                                           |
| mRS 3-5 after MT alone within 4.5 hours from onset         | 33.9%  | Dirichlet | 0-1 |              |                                                                                                                           |
| mRS 6 after MT alone within 4.5 hours from onset           | 25%    | Dirichlet | 0-1 |              |                                                                                                                           |
| mRS 0 after no IV-tPA nor MT within 4.5 hours from onset   | 17.95% | Dirichlet | 0-1 | Hacke (4)    | 14 European countries Australia and New-Zealand. ECASS II trial. Outcome for the placebo-group patients (against IV-tPA). |
| mRS 1-2 after no IV-tPA nor MT within 4.5 hours from onset | 28.3%  | Dirichlet | 0-1 |              |                                                                                                                           |
| mRS 3-5 after no IV-tPA nor MT within 4.5 hours from onset | 43.4%  | Dirichlet | 0-1 |              |                                                                                                                           |
| mRS 6 after no IV-tPA nor MT within 4.5 hours from onset   | 10.35% | Dirichlet | 0-1 |              |                                                                                                                           |

TP: true positive; FP: false positive; FN: false negative; TN: true negative; IV-tPA: intravenous tissue-type plasminogen activator

MT: mechanical thrombectomy

Table I continued

| Transition probabilities in the Markov model |                        |                                |             |                                          |                                             |
|----------------------------------------------|------------------------|--------------------------------|-------------|------------------------------------------|---------------------------------------------|
|                                              |                        | State at end of cycle          |             |                                          |                                             |
|                                              |                        | mRS 0-2                        | mRS 3-5     | recurrent stroke                         | mRS 6                                       |
| State at start of cycle                      | Year 1 (month 3 to 12) |                                |             |                                          |                                             |
|                                              | mRS 0-2                | 0.955*                         | 0.024*      | 0.013*                                   | 0.008*                                      |
|                                              | Distribution           | Dirichlet (range 0-1)          |             |                                          |                                             |
|                                              | mRS 3-5                | 0.029*                         | 0.919*      | 0.013*                                   | 0.039*                                      |
|                                              | Distribution           | Dirichlet (range 0-1)          |             |                                          |                                             |
|                                              | Year 2 and onward      |                                |             |                                          |                                             |
|                                              | mRS 0-2                | Varied based on mortality risk | 0 (assumed) | 0.013                                    | UK life table (9) + hazard ratio: 1.29 (10) |
|                                              | Distribution           | Based on mortality risk        | NA          | Beta ( $\alpha = 1.3$ ; $\beta = 98.7$ ) | Log-normal for hazard ratio (SE=0.22)       |

|                                                                                                                                                                                                 |                        |                               |                                   |                                                                    |                                             |
|-------------------------------------------------------------------------------------------------------------------------------------------------------------------------------------------------|------------------------|-------------------------------|-----------------------------------|--------------------------------------------------------------------|---------------------------------------------|
|                                                                                                                                                                                                 | <b>mRS 3-5</b>         | 0 (assumed)                   | Varied based on mortality risk    | 0.013                                                              | UK life table (9) + hazard ratio: 3.33 (10) |
|                                                                                                                                                                                                 | <b>Distribution</b>    | NA                            | Varied based on mortality risk    | Beta ( $\alpha = 1.3$ ; $\beta = 98.7$ )                           | Log-normal for hazard ratio (SE=0.75)       |
| *Ganesalingam (11)                                                                                                                                                                              |                        |                               |                                   |                                                                    |                                             |
| <b>Transition probabilities after recurrence</b><br>(base-case ranges for the 9 scenarios according to the results of the short-run 90-day decision-tree)                                       |                        |                               |                                   |                                                                    |                                             |
| <b>CCEMT strategy</b>                                                                                                                                                                           |                        | <b>State after recurrence</b> |                                   |                                                                    |                                             |
| <b>State before recurrence</b>                                                                                                                                                                  |                        | <b>mRS 0-2</b>                |                                   | <b>mRS 3-5</b>                                                     | <b>mRS 6</b>                                |
|                                                                                                                                                                                                 | <b>mRS 0-2</b>         | 0.45 to 0.52                  |                                   | 0.35 to 0.38                                                       | 0.13 to 0.17                                |
|                                                                                                                                                                                                 | <b>mRS 3-5</b>         | 0 **                          |                                   | 0.83 to 0.87                                                       | 0.13 to 0.17***                             |
| <b>AIELMT strategy</b>                                                                                                                                                                          |                        |                               |                                   |                                                                    |                                             |
| <b>State before recurrence</b>                                                                                                                                                                  |                        | <b>mRS 0-2</b>                |                                   | <b>mRS 3-5</b>                                                     | <b>mRS 6</b>                                |
|                                                                                                                                                                                                 | <b>mRS 0-2</b>         | 0.51 to 0.54                  |                                   | 0.32 to 0.34                                                       | 0.12 to 0.16                                |
|                                                                                                                                                                                                 | <b>mRS 3-5</b>         | 0 **                          |                                   | 0.84 to 0.88                                                       | 0.12 to 0.16***                             |
| Distributions: No independent distribution was defined for these probabilities. Probabilities are varying based on the 3000 PSA results (expected value of probabilities) of the decision tree. |                        |                               |                                   |                                                                    |                                             |
| ** assumed according to natural evolution of stroke                                                                                                                                             |                        |                               |                                   |                                                                    |                                             |
| *** assumed to be equal to the transition from recurrence to death of patients initially in mRS 0-2                                                                                             |                        |                               |                                   |                                                                    |                                             |
| <b>Costs and resource use</b>                                                                                                                                                                   |                        |                               |                                   |                                                                    |                                             |
| <b>Item</b>                                                                                                                                                                                     | <b>Base-Case value</b> | <b>Distribution</b>           | <b>Range</b>                      | <b>Source</b>                                                      |                                             |
| <b>Costs and resource use in the decision tree</b>                                                                                                                                              |                        |                               |                                   |                                                                    |                                             |
| CT scan                                                                                                                                                                                         | \$117 (£88)            | Beta Pert                     | \$113-\$121 (£85-£91)             | (RD20A) in the 2017/2018 National Schedule of Reference Costs (12) |                                             |
| CTA scan                                                                                                                                                                                        | \$141 (£106)           | Beta Pert                     | \$135-\$146 (£102-£110)           | (RD21A) in the 2017/2018 National Schedule of Reference Costs (12) |                                             |
| Advanced-Imaging scan                                                                                                                                                                           | \$213 (£160)           | Beta Pert                     | \$186-\$239 (£140-£180)           | Assumed                                                            |                                             |
| IV-tPA (acquisition + administration)                                                                                                                                                           | \$2,318 (£1743)        | Beta Pert                     | \$2,088-\$2,548 (£1,570-£1,916)   | Multiple sources, see calculation methods in Appendix              |                                             |
| MT (including stent, material and surgery)                                                                                                                                                      | \$11,784 (£8860)       | Beta Pert                     | \$8,261-\$15,320 (£6,212-£11,519) | Ganesalingam (11), clinical expert feedback                        |                                             |
| Acute first 3-month costs                                                                                                                                                                       |                        | Beta Pert                     |                                   | Luengo-Fernandez (13)                                              |                                             |
|                                                                                                                                                                                                 | mRS 0-2                | \$5,095 (£3,831)              |                                   | \$2,100-\$8,090 (£1,579-£6,083)                                    |                                             |

|                                                                |                                        |                                                                                                                                                          |                                        |                                     |
|----------------------------------------------------------------|----------------------------------------|----------------------------------------------------------------------------------------------------------------------------------------------------------|----------------------------------------|-------------------------------------|
| mRS 3-5                                                        | \$29,274 (£22,011)                     |                                                                                                                                                          | \$22,934-\$35,613<br>(£17,244-£26,777) |                                     |
| mRS 6                                                          | \$4,570 (£3,436)                       |                                                                                                                                                          | \$2,530-\$6,611<br>(£1,902-£4,971)     |                                     |
| <b>Costs and resource use in the Markov model</b>              |                                        |                                                                                                                                                          |                                        |                                     |
| 3-monthly long-term healthcare costs (day 90 onwards)          |                                        | Beta Pert                                                                                                                                                |                                        | Luengo-Fernandez (13)               |
| mRS 0-2                                                        | \$818 (£615)                           |                                                                                                                                                          | \$479-1,158<br>(£360-£871)             |                                     |
| mRS 3-5                                                        | \$1738 (£1,307)                        |                                                                                                                                                          | \$912-2564<br>(£686-£1,928)            |                                     |
| Cost of recurrent stroke (90 days following stroke recurrence) |                                        |                                                                                                                                                          |                                        |                                     |
| In the CCEMT strategy                                          | \$9,827 (£7,389) to \$10,307 (£7,750)  | No independent distribution was defined. Costs are varying based on the 3000 PSA results (expected value of costs) of the decision tree.                 |                                        | From short-run 90-day decision-tree |
| In the AIELMT strategy                                         | \$10,161 (£7,640) to \$12,534 (£9,424) |                                                                                                                                                          |                                        |                                     |
| <b>Utilities</b>                                               |                                        |                                                                                                                                                          |                                        |                                     |
| Independent mRS 0-1-2                                          | 0.71                                   | Beta                                                                                                                                                     | 0.7-0.72                               | Wardlaw, analysis of CLOTS (14)     |
| Dependent mRS 3-4-5                                            | 0.20                                   | Beta                                                                                                                                                     | 0.19-0.21                              |                                     |
| Dead mRS 6                                                     | 0                                      | -                                                                                                                                                        | -                                      | -                                   |
| Recurrent stroke (90 days following stroke recurrence)         |                                        |                                                                                                                                                          |                                        |                                     |
| In the CCEMT strategy                                          | 0.28 to 0.31                           | No independent distribution was defined. Utilities are varying based on the 3000 PSA results (expected value of stroke recurrence) of the decision tree. |                                        | From short-run 90-day decision-tree |
| In the AIELMT strategy                                         | 0.30 to 0.32                           |                                                                                                                                                          |                                        |                                     |

**Table II: Hazard ratios for mortality**  
**Table from Slot et al. study (10).**

| mRS | Lothian (N=2054)         |
|-----|--------------------------|
| 0   | 1; N=283                 |
| 1   | 0.98 (0.63, 1.54); N=404 |
| 2   | 1.74 (1.16, 2.61); N=455 |
| 3   | 2.58 (1.73, 3.87); N=360 |
| 4   | 3.89 (2.48, 6.12); N=122 |
| 5   | 4.98 (3.15, 7.88); N=122 |
| 6   | 0                        |

A weighted average of these values gives 1.29 for mRS012 and 3.33 for mRS345.

**Table III: Intermediate outcomes of late MT according to advanced imaging accuracy (as modelled in the AIELMT strategy of the decision tree)**

|                                                                       |                                                                                                              |                                                                                                                              |
|-----------------------------------------------------------------------|--------------------------------------------------------------------------------------------------------------|------------------------------------------------------------------------------------------------------------------------------|
|                                                                       | Truth<br>(late MT will be beneficial)                                                                        | Truth<br>(late MT will not be beneficial)                                                                                    |
| Positive test<br>(AdvImg informs that late MT will be beneficial)     | <b>TP rate</b> (patients with LAO moderate or severe receiving late MT)<br>= prior probability * sensitivity | <b>FP rate</b> (patients with LAO mild or small occlusions receiving late MT)<br>= 1 – TP – FN – TN                          |
| Negative test<br>(AdvImg informs that late MT will not be beneficial) | <b>FN rate</b> (patients with LAO moderate or severe not receiving late MT)<br>= prior probability - TP      | <b>TN rate</b> (patients with LAO mild or small occlusions not receiving late MT)<br>= (1 – prior probability) * specificity |
|                                                                       | <b>Sensitivity</b><br>= TP/(TP+FN)                                                                           | <b>Specificity</b><br>= TN/(FP+TN)                                                                                           |

TP: true positive; FP: false positive; FN: false negative; TN: true negative

MT: mechanical thrombectomy

**Table IV: Outcomes for FP AIS patients after correction for embolic and hemorrhagic complications after standalone MT (AIELMT strategy)**

a) Rates of periprocedural complications and deaths after complications after MT

|                           | Standalone MT | MT combined to IV-tPA | Death after complications | Death after embolic and hemorrhagic complications after standalone MT |
|---------------------------|---------------|-----------------------|---------------------------|-----------------------------------------------------------------------|
| Total patients            | 50            | 94                    | -                         |                                                                       |
| Embolic complications     | 8 (16%)       | 10 (10.6%)            | 38.9%                     | 16% * 38.9% = 6.2%                                                    |
| Hemorrhagic complications | 9 (18%)       | 20 (21.3%)            | 45.5%                     | 45.5% * 18% = 8.2%                                                    |
|                           |               |                       |                           | 6.22% + 8.19% = 14.4%                                                 |

b) Outcomes for FP AIS patients after correction for periprocedural complications

|                                                       | Outcome for TN (no MT) | Outcome for FP (MT) in the AIELMT strategy after correction for complications after MT |
|-------------------------------------------------------|------------------------|----------------------------------------------------------------------------------------|
| mRS 0 after mild stroke and beyond 6 hours from onset | 18.3%                  | 16.5%                                                                                  |

|                                                         |       |              |
|---------------------------------------------------------|-------|--------------|
| mRS 1-2 after mild stroke and beyond 6 hours from onset | 42.5% | 40.7%        |
| mRS 3-5 after mild stroke and beyond 6 hours from onset | 30.2% | 28.4%        |
| mRS 6 after mild stroke and beyond 6 hours from onset   | 9%    | <b>14.4%</b> |

**Table Va: Inflated 2016/17 resource use costs for administration of IV-tPA from Sandercock et al. (15)**

| Extra staffing requirements                                             | Comments                                                                                                                                                                                | PSSRU 2017 definitions                                                                 | 2016/2017 cost per hour                    | 2018 inflated cost per hour | 2018 cost |
|-------------------------------------------------------------------------|-----------------------------------------------------------------------------------------------------------------------------------------------------------------------------------------|----------------------------------------------------------------------------------------|--------------------------------------------|-----------------------------|-----------|
| 5 min additional nurse time                                             | PSSRU 2011 (staff nurse 24hr ward)                                                                                                                                                      | Nurse (Band 5) (Section 14 of PSSRU 2017)<br>Cost per hour of patient contact          | £89<br><br>(Cost per working hour is £37)  | £90.59                      | £7.55     |
| 190 min registrar time                                                  | PSSRU 2011 (registrar group)                                                                                                                                                            | Registrar (Section 15 of PSSRU 2017).<br>Cost per working hour                         | £43                                        | £43.77                      | £138.60   |
| 50 min consultant time                                                  | PSSRU 2011 (medical consultant costs)                                                                                                                                                   | Medical consultant (Section 15 of PSSRU 2017)<br>Cost per working hour                 | £106                                       | £107.89                     | £89.91    |
| 5 min routine observation by senior nurse in place of more junior nurse | It has been assumed that observations are carried out by a senior nurse, and that each observation takes 5 minutes<br><br>PSSRU 2011 (ward manager 24hr ward and staff nurse 24hr ward) | Nurse advanced (band 7) (Section 14 of PSSRU 2017)<br>Cost per hour of patient contact | £131<br><br>(Cost per working hour is £54) | £133.34                     | £11.11    |
| 12 additional sets of observations at 5 min each                        | It has been assumed that routine observations take 5 minutes to be carried out<br>PSSRU 2011 (ward manager 24hr ward)                                                                   | Nurse advanced (band 7) (Section 14 of PSSRU 2017)<br>Cost per hour of patient contact | £131<br><br>(Cost per working hour is £54) | £133.34                     | £133.34   |
| 5 hours 1:1 senior nurse care                                           | PSSRU 2011 (ward manager 24hr ward)                                                                                                                                                     | Nurse advanced (band 7) (Section 14 of PSSRU 2017)<br>Cost per hour of patient contact | £131<br><br>(Cost per working hour is £54) | £133.34                     | £666.69   |
| 10 min overnight junior staff review                                    | PSSRU 2011 (foundation house officer 1)                                                                                                                                                 | Foundation doctor (FY1) (Section 15 of PSSRU 2017)<br>Cost per working hour            | £26                                        | £26.46                      | £4.41     |
| <b>TOTAL</b>                                                            |                                                                                                                                                                                         |                                                                                        |                                            |                             | £1052     |

**Table Vb: breakdown of cost of IV-tPA**

|                                   |                                                                                                                                                                                                                                                                                                                                                                                                                          |
|-----------------------------------|--------------------------------------------------------------------------------------------------------------------------------------------------------------------------------------------------------------------------------------------------------------------------------------------------------------------------------------------------------------------------------------------------------------------------|
| IV-tPA                            | £1743                                                                                                                                                                                                                                                                                                                                                                                                                    |
| Drug acquisition                  | <p>£691.20</p> <p>900 micrograms required per kg (16);<br/>75kg/patient; 67.5mg per patient<br/>£259.20 for 20mg pack + £432 for 50mg pack =&gt;£691.20 per patient</p> <p>Lower<br/>60kg/patient; 54mg per patient<br/>£172.80 for 10mg pack + £432 for 50mg pack =&gt; £604.80</p> <p>Upper<br/>85kg/patient; 76.5mg per patient<br/>£172.80 for 10mg pack + £259.20 for 20mg pack + £432 for 50mg pack =&gt; £864</p> |
| Administration                    | <p>£1,052</p> <p>Lower: £965</p> <p>Upper: £1,052</p>                                                                                                                                                                                                                                                                                                                                                                    |
| Drug acquisition + administration | <p>Average: 691.2 + 1052 = £1,743.2</p> <p>Lower: 604.8 + 965 = £1,569.8</p> <p>Upper: 864 + 1052 = £1,916</p>                                                                                                                                                                                                                                                                                                           |

Assuming an average patient weight of 75kg, based on an indication of 900 micrograms per kg (17), the average drug acquisition cost was estimated to be £691.20. Assuming alternative weights of 60kg and 85kg led to required doses of 54mg and 76.5mg, respectively. We then assumed a lower estimate of drug acquisition costs to be £604.80 (assuming between 50mg and 60mg are required per patient), and £864 (assuming between 70mg and 80mg are required per patient).

The administration costs, that were based on those from Sandercock et al. study (2004) (15) and inflated for 2018, amount for £1,051.6. Discussion with a clinical expert regarding general changes in the care of stroke patients over time suggests that the difference in care between patients receiving IV-tPA and those not receiving IV-tPA may not anymore be as important as the estimates that Sandercock suggested for the year 2004. In particular, less administrative (145 minutes) and consultant (20 minutes) time should be assumed for patients receiving IV-tPA compared to 2004. Based on this, we estimated a lower estimate of the costs of administration of patients receiving IV-tPA of £965.



**Table VI: distribution of ischemic patients across the mRS scale at three months per prior probability and AdvImg accuracy (results of the model)**

|                                                   | Advanced imaging accuracy                 | Prior probability | Ischemic patients in mRS 0 | Ischemic patients in mRS 1-2 | Ischemic patients in mRS 3-4-5 | Ischemic patients in mRS 6 |
|---------------------------------------------------|-------------------------------------------|-------------------|----------------------------|------------------------------|--------------------------------|----------------------------|
| CT-CTA and no late MT strategy                    | NA                                        | 10%               | 15%                        | 36%                          | 35%                            | 13%                        |
|                                                   | NA                                        | 20%               | 14%                        | 34%                          | 36%                            | 15%                        |
|                                                   | NA                                        | 30%               | 13%                        | 32%                          | 38%                            | 17%                        |
| AdvImg followed by late MT strategy (9 scenarios) | <b>perfect advanced-imaging test</b>      | 10%               | 16%                        | 39%                          | 33%                            | 12%                        |
|                                                   |                                           | 20%               | 15%                        | 38%                          | 33%                            | 14%                        |
|                                                   |                                           | 30%               | 14%                        | 38%                          | 32%                            | 16%                        |
|                                                   | <b>sensitivity: 80% specificity: 100%</b> | 10%               | 16%                        | 38%                          | 34%                            | 12%                        |
|                                                   |                                           | 20%               | 15%                        | 38%                          | 34%                            | 14%                        |
|                                                   |                                           | 30%               | 14%                        | 37%                          | 34%                            | 15%                        |
|                                                   | <b>sensitivity: 100% specificity: 70%</b> | 10%               | 15%                        | 38%                          | 33%                            | 13%                        |
|                                                   |                                           | 20%               | 15%                        | 38%                          | 33%                            | 14%                        |
|                                                   |                                           | 30%               | 14%                        | 38%                          | 33%                            | 15%                        |

NA: not applicable

**Table VII: Lifetime costs, LYs and QALYs for the nine investigated scenarios (results of the model)**

|                        | pre-test probability | COSTS    |          |         | LYs   |        |         | QALYs |        |         |
|------------------------|----------------------|----------|----------|---------|-------|--------|---------|-------|--------|---------|
|                        |                      | CCEMT    | AIELMT   | INCREM. | CCEMT | AIELMT | INCREM. | CCEMT | AIELMT | INCREM. |
| <b>perfect test</b>    | 10%                  | \$55.985 | \$57.245 | \$1.260 | 7,186 | 7,339  | 0,153   | 3,732 | 3,886  | 0,154   |
|                        | 20%                  | \$55.727 | \$58.020 | \$2.293 | 6,907 | 7,209  | 0,302   | 3,510 | 3,813  | 0,303   |
|                        | 30%                  | \$55.474 | \$58.793 | \$3.319 | 6,634 | 7,081  | 0,447   | 3,293 | 3,741  | 0,448   |
| <b>se=0,8<br/>sp=1</b> | 10%                  | \$55.985 | \$57.036 | \$1.051 | 7,186 | 7,308  | 0,122   | 3,732 | 3,855  | 0,123   |
|                        | 20%                  | \$55.727 | \$57.604 | \$1.876 | 6,907 | 7,148  | 0,241   | 3,510 | 3,752  | 0,242   |
|                        | 30%                  | \$55.474 | \$58.169 | \$2.695 | 6,634 | 6,990  | 0,356   | 3,293 | 3,649  | 0,357   |
| <b>se=1<br/>sp=0,7</b> | 10%                  | \$55.985 | \$60.621 | \$4.637 | 7,186 | 7,226  | 0,040   | 3,732 | 3,826  | 0,094   |
|                        | 20%                  | \$55.727 | \$61.014 | \$5.287 | 6,907 | 7,110  | 0,202   | 3,510 | 3,760  | 0,250   |
|                        | 30%                  | \$55.474 | \$61.407 | \$5.932 | 6,634 | 6,994  | 0,360   | 3,293 | 3,695  | 0,402   |

**Table VIII: ICERS at 90 days and lifetime horizon for the nine investigated scenarios (results of the model)**

|                      | ICER (cost per LY gained) lifetime |                              |                                 | ICER (cost per QALY gained) lifetime |                              |                                |
|----------------------|------------------------------------|------------------------------|---------------------------------|--------------------------------------|------------------------------|--------------------------------|
|                      | se=1 sp=1                          | se=0,8 sp=1                  | se=1 sp=0,7                     | se=1 sp=1                            | se=0,8 sp=1                  | se=1 sp=0,7                    |
| pre-test proba = 30% | 3 months<br><b>\$240.245</b>       | 3 months<br><b>\$245.411</b> | 3 months<br><b>\$805.037</b>    | 3 months<br><b>\$131.805</b>         | 3 months<br><b>\$134.640</b> | 3 months<br><b>\$322.752</b>   |
|                      | lifetime<br><b>\$7.424</b>         | lifetime<br><b>\$7.565</b>   | lifetime<br><b>\$16.465</b>     | lifetime<br><b>\$7.410</b>           | lifetime<br><b>\$7.557</b>   | lifetime<br><b>\$14.765</b>    |
| pre-test proba = 20% | 3 months<br><b>\$250.578</b>       | 3 months<br><b>\$258.328</b> | 3 months<br><b>\$1.811.967</b>  | 3 months<br><b>\$137.474</b>         | 3 months<br><b>\$141.726</b> | 3 months<br><b>\$494.846</b>   |
|                      | lifetime<br><b>\$7.586</b>         | lifetime<br><b>\$7.780</b>   | lifetime<br><b>\$26.113</b>     | lifetime<br><b>\$7.569</b>           | lifetime<br><b>\$7.767</b>   | lifetime<br><b>\$21.156</b>    |
| pre-test proba = 10% | 3 months<br><b>\$281.579</b>       | 3 months<br><b>\$297.079</b> | 3 months<br><b>-\$4.280.241</b> | 3 months<br><b>\$154.482</b>         | 3 months<br><b>\$162.986</b> | 3 months<br><b>\$1.258.398</b> |
|                      | lifetime<br><b>\$8.221</b>         | lifetime<br><b>\$8.586</b>   | lifetime<br><b>\$115.077</b>    | lifetime<br><b>\$8.199</b>           | lifetime<br><b>\$8.566</b>   | lifetime<br><b>\$49.515</b>    |

**Methods and sources used to calculate the probabilities of the decision tree**

### Calculation of the probability that the ischemic patient imaged within 4,5 hours receives IV-tPA:

We assumed that 70% of the ischemic stroke patients managed within 4,5 hours were eligible to IV-tPA (in reference to the fact that 80+ patients should be considered on individual basis).

The percentage of all stroke patients (all stroke types) given thrombolysis (April 2016-March 2017) is 11.6%.

The percentage of eligible patients (according to the Royal College of Physicians guideline minimum threshold) given thrombolysis (April 2016-March 2017) is 86.9%.

Based on these proportions, we calculated the probability that the ischemic patient imaged within 4,5 hours receives IV-tPA.

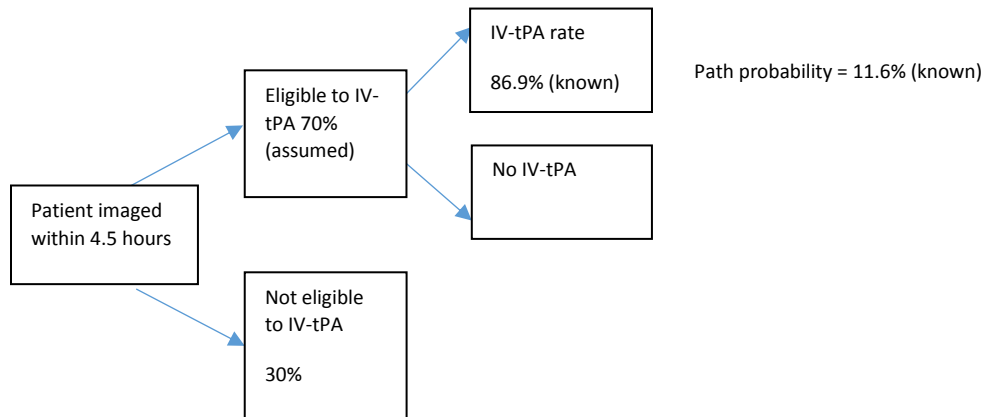

Based on the above data:

Probability that the ischemic patient imaged within 4,5 hours receives IV-tPA

$$= (86.9 \times 70 / 100) / 100$$

$$= 0.608$$

This appeared to be consistent with the study by Mc Meekin et al. (18). They reported that:

- the early presenters (within 4 hours) were 15350.

- those who received IV-tPA if eligible were 10130

This lead to a probability to receive IV-tPA of  $10130/15350 = 65.9\%$ .

### Calculation of the probability that the ischemic patient is being imaged within 4.5 hours after symptom onset and calculation of the probability that the ischemic patient is being imaged between 4.5 and 6 hours after symptom onset

1. The distribution of onset to hospital times is known (figure below)

2. The probability to receive a scan within 1 hour once the patient is in the hospital is known (51.3%) based on these, we estimated the distribution from onset to CT times

3. Assumptions:

3a. the distribution of patients with known and unknown onset time is the same among ischemic and hemorrhagic patients.

3b. we found in the literature the proportion of patients per hour range from onset to hospital arrival (for patients with known onset). In each hour range, we assumed that the proportion of patients in the first half hour equals the proportion of patients in the second half hour.

3c. finally, we assumed that the probability for a patient to receive a scan within 1 hour is related to the time from symptom onset to arrival at hospital. Patients that have a shorter time since onset are more likely to receive a scan within 1 hour than those who had their onset a longer time ago. Therefore, we assumed that the probability to receive a scan within 1 hour when the time from onset is below 3.5 hours was 60%.

| Values                                                                                                                                                                                                                                                                                                                                                                                                                                                                                                 | Reference                                                                                                                                                                                                                                       |
|--------------------------------------------------------------------------------------------------------------------------------------------------------------------------------------------------------------------------------------------------------------------------------------------------------------------------------------------------------------------------------------------------------------------------------------------------------------------------------------------------------|-------------------------------------------------------------------------------------------------------------------------------------------------------------------------------------------------------------------------------------------------|
| Percentage of patients scanned within 1 hour of arrival at hospital:<br>2016/2017: 51.3%                                                                                                                                                                                                                                                                                                                                                                                                               | The Fourth SSNAP Annual Report<br><a href="https://www.strokeaudit.org/Documents/AnnualReport/2016-17-SSNAP-Annual-Report.aspx">https://www.strokeaudit.org/Documents/AnnualReport/2016-17-SSNAP-Annual-Report.aspx</a>                         |
| 32% of patients had an unknown stroke onset<br><br>68% had a precise or best estimate of the stroke onset time                                                                                                                                                                                                                                                                                                                                                                                         | <a href="https://www.strokeaudit.org/getattachment/AnnualReport/Historical-Guideline/Apr2014Mar2015-AnnualReport.pdf.aspx">https://www.strokeaudit.org/getattachment/AnnualReport/Historical-Guideline/Apr2014Mar2015-AnnualReport.pdf.aspx</a> |
| Distribution of onset to arrival at hospital time<br><br>Time from onset to arrival < 3.5 hours: 59%<br><br>Time from from onset to arrival known and >3.5 hours: 41%<br><br>Time from onset to arrival between 3.5 and 5 hours: 8.5%                                                                                                                                                                                                                                                                  | <a href="https://www.strokeaudit.org/AnnualReport/Historical.aspx">https://www.strokeaudit.org/AnnualReport/Historical.aspx</a><br><br>figure 4: Symptom onset time to arrival at hospital, for patients with known or estimated onset time     |
| Calculation:                                                                                                                                                                                                                                                                                                                                                                                                                                                                                           |                                                                                                                                                                                                                                                 |
| <p>probability that the ischemic patient is being imaged within 4.5 hours after symptom onset</p> <p>= probability that the time from onset is known * probability that the time from onset is less than 3.5 hours * probability that the patient receives a scan within 1 hour of hospital admission</p> <p>= 0.68 * 0.59 * 0.6</p> <p>= 0.24</p> <p>probability that the ischemic patient is being imaged between 4.5 and 6 hours after symptom onset</p> <p>= 0.68 * 0.085 * 0.6</p> <p>= 0.034</p> |                                                                                                                                                                                                                                                 |

**Calculation of the conditional probabilities that the ischemic patient receives MT**

The calculation of the probabilities to have a thrombectomy within and beyond 4.5 hours and with or without IV-tPA (among all thrombectomies) was based on some known proportions and complemented by assumptions.

1. The total number of thrombectomies from April 2016 to March 2017 was 580. The number of thrombectomies with IV t-PA is known (369 per year, 63.6% of all thrombectomies). It was assumed that thrombectomies performed after IV t-PA were administered either right after thrombolysis or in a delay of maximum 6 hours.

2. It was assumed that 75% of the thrombectomies performed without IV t-PA happened between 4.5 and 6 hours from symptom onset. The remaining 25% of the thrombectomies performed without IV t-PA happened within 4.5 hours from onset.

|                                                                      | Total | Probabilities among all thrombectomies | References                                                                                                                                                                                                         |
|----------------------------------------------------------------------|-------|----------------------------------------|--------------------------------------------------------------------------------------------------------------------------------------------------------------------------------------------------------------------|
| Thrombectomies                                                       | 580   | 100%                                   | <a href="https://www.strokeaudit.org/results/Clinical-audit/National-Results.aspx">https://www.strokeaudit.org/results/Clinical-audit/National-Results.aspx</a><br>Thrombectomy Report for April 2016 - March 2017 |
| Thrombectomies after IV t-PA                                         | 369   | 63.6%                                  |                                                                                                                                                                                                                    |
| Thrombectomies without IV t-PA                                       | 211   | 36.4%                                  |                                                                                                                                                                                                                    |
| Thrombectomies without IV t-PA beyond 4.5 hours (and within 6 hours) | 158   | 27.3%                                  | Assumed                                                                                                                                                                                                            |
| Thrombectomies without IV t-PA within 4.5 hours                      | 53    | 9.1%                                   | Assumed                                                                                                                                                                                                            |

|                                                 | Thrombectomies after IV t-PA | Thrombectomies without IV t-PA | Total thrombectomies with and without IV t-PA |
|-------------------------------------------------|------------------------------|--------------------------------|-----------------------------------------------|
| Thrombectomies within 4.5 hours                 | 369 (63.6%)                  | 53<br>(25%*36.4% = 9.1%)       | -                                             |
| Thrombectomies between 4.5 and 6 hours          |                              | 158<br>(75%*36.4% = 27.3%)     | -                                             |
| Total thrombectomies within and after 4.5 hours | 369 (63.6%)                  | 211 (36.4%)                    | 580 (100%)                                    |

|  |                                      |
|--|--------------------------------------|
|  | Probability among all thrombectomies |
|--|--------------------------------------|

|                                                        |       |
|--------------------------------------------------------|-------|
| Thrombectomies without IV t-PA within 4.5 hours        | 9.1%  |
| Thrombectomies without IV t-PA between 4.5 and 6 hours | 27.3% |
| Thrombectomies after IV t-PA                           | 63.6% |

|                                               |       |
|-----------------------------------------------|-------|
| all strokes (England, Wales, Northern Island) | 85122 |
| ischemic stroke patients                      | 74216 |
| hemorrhagic stroke patients                   | 10906 |

3. The 3 conditional probabilities of interest used in the decision tree were back-calculated using the conditional probabilities in the related branches.

3a. Probability that the ischemic patient imaged within 4.5 hours receives MT any time after IV t-PA:  
Probability to be imaged within 4.5 hours \* Probability to receive IV t-PA \* Probability to have a MT after IV t-PA = percentage of ischemic stroke patients receiving MT after IV t-PA

Hence:

Probability to have a MT after IV t-PA

= percentage of ischemic stroke patients receiving MT after IV t-PA / (Probability to be imaged within 4.5 hours \* Probability to receive IV t-PA)

= (369/74216)/(0.24\*0.60)

= 0.034

3b. Probability that the ischemic patient imaged within 4.5 hours receives MT alone (without IV t-PA):

Probability to be imaged within 4.5 hours \* Probability to receive MT within 4.5 hours = percentage of ischemic stroke patients receiving MT within 4.5 hours without IV-tPA

Hence:

Probability to have a MT within 4.5 hours from onset (without IV t-PA)

= percentage of ischemic stroke patients receiving MT within 4.5 hours without IV-tPA /

Probability to be imaged within 4.5 hours

= (53/74216)/0.24

= 0.0029

3c. Probability that the ischemic patient imaged beyond 4.5 hours receives MT between 4.5 and 6 hours from symptom onset (without IV t-PA):

Probability to be imaged beyond 4.5 hours \* Probability to receive care between 4.5 and 6 hours \*

Probability to receive MT between 4.5 and 6 hours = percentage of ischemic stroke patients receiving MT beyond 4.5 hours without IV t-PA

Hence:

Probability to have a MT between 4.5 and 6 hours from onset (without IV t-PA)

= percentage of ischemic stroke patients receiving MT beyond 4.5 hours without IV t-PA/

(Probability to be imaged beyond 4.5 hours\* Probability to receive care between 4.5 and 6 hours)

= (158/74216)/(0.76\*0.034)

=0.08

## References

1. Programme, SSNAP Sentinel Stroke National Audit. Thrombectomy Report for April 2016 - March 2017. <https://www.strokeaudit.org/results/Clinical-audit/National-Results.aspx>. Accessed March 15, 2018.
2. Watkins CL, Jones SP, Leathley MJ, Ford GA, Quinn T, McAdam JJ et al. Emergency Stroke Calls: Obtaining Rapid Telephone Triage (ESCORTT) – a programme of research to facilitate recognition of stroke by emergency medical dispatchers: Southampton (UK). *NIHR Journals Library*; 2014; 2:1–124.
3. Minnerup J, Wersching H, Teuber A, Wellmann J, Eyding J, Weber R et al.; REVASK Investigators. Outcome after thrombectomy and intravenous thrombolysis in patients with acute ischemic stroke: a prospective observational study. *Stroke*. 2016;47:1584-1592.
4. Hacke W, Kaste M, Fieschi C, von Kummer R, Davalos A, Meier D, et al. Randomised double-blind placebo-controlled trial of thrombolytic therapy with intravenous alteplase in acute ischaemic stroke (ECASS II): Second European-Australasian Acute Stroke Study Investigator. *Lancet*. 1998; 352:1245–1251.

5. Nogueira RG, Jadhav AP, Haussen DC, Bonafe A, Budzik RF, Bhuva P, et al.; DAWN Investigators. Thrombectomy 6 to 24 hours after stroke with a mismatch between deficit and infarct. *N Engl J Med*. 2018;378:11–2.
6. Lees KR, Emberson J, Blackwell L, Bluhmki E, Davis SM, Donnan GA, et al. on behalf of the Stroke Thrombolysis Trialists' Collaborators Group. Effects of Alteplase for Acute Stroke on the Distribution of Functional Outcomes: A Pooled Analysis of 9 Trials. *Stroke*. 2016; 47:2373–2379.
7. Gascou G, Lobotesis K, Machi P, Maldonado I, Vendrell JF, Riquelme C, et al. Stent Retrievers in Acute Ischemic Stroke: Complications and Failures during the Perioperative Period. *AJNR Am J Neuroradiol*. 2014;35:734-740.
8. Berkhemer OA, Fransen PS, Beumer D, van den Berg LA, Lingsma HF, Yoo AJ, et al. MR CLEAN Investigators. A randomized trial of intraarterial treatment for acute ischemic stroke. *N Engl J Med*. 2015; 372:11–20.
9. Dataset: National Life tables: United Kingdom (2014-2016). <https://www.ons.gov.uk/peoplepopulationandcommunity/birthsdeathsandmarriages/lifeexpectancies/datasets/nationallifetablesunitedkingdomreferencetables>, Accessed April 15, 2018. Accessed February 15, 2018.
10. Slot KB, Berge E, Dorman P, Lewis S, Dennis M and Sandercock P. Impact of functional status at six months on long term survival in patients with ischaemic stroke: prospective cohort studies. *BMJ*. 2008;336:376-379.
11. Ganesalingam J, Pizzo E, Morris S, Sunderland T, Ames D and Lobotesis K. Cost-Utility Analysis of Mechanical Thrombectomy Using Stent Retrievers in Acute Ischemic Stroke. *Stroke*. 2015; 46:2591-2598.
12. NHS Reference costs. <https://improvement.nhs.uk/resources/reference-costs/>. Accessed November 15, 2018.
13. Luengo-Fernandez R, Yiin GS, Gray AM, Rothwell PM. Population-based study of acute- and long-term care costs after stroke in patients with AF. *Int J Stroke*. 2013; 8:308–314.
14. Wardlaw J, Brazzelli M, Miranda H, Chappell F, McNamee P, Scotland G et al. An assessment of the cost-effectiveness of magnetic resonance, including diffusion-weighted imaging, in patients with transient ischaemic attack and minor stroke: a systematic review, meta-analysis and economic evaluation. *Health Technol Assess*. 2014;18:1-368.
15. Sandercock P, Berge E, Dennis M, Forbes J, Hand P, Kwan J et al. Cost-effectiveness of thrombolysis with recombinant tissue plasminogen activator for acute ischemic stroke assessed by a model based on UK NHS costs. *Stroke*. 2004;35:1490-1497.
16. UK BNF British National Formulary – NICE. <https://bnf.nice.org.uk/medicinal-forms/alteplase.html>. Accessed November 15, 2018.
17. Wahlgren N, Ahmed N, Davalos A, Hacke W, Millan M, Muir K et al. SITS investigators. Thrombolysis with alteplase 3-4.5 h after acute ischemic stroke (SITS-ISTR): an observational study. *Lancet*. 2008;372:1303-1309.
18. McMeekin P, White P, James MA, Price CI, Flynn D, Ford GA. Estimating the number of UK stroke patients eligible for endovascular thrombectomy. *Eur Stroke J*. 2017;2:319–326.
